1 **Two cases of type-a *Haemophilus influenzae* meningitis within the same week in the same**  
2 **hospital are phylogenetically unrelated but recently exchanged capsule genes**

3

4 Yves Terrat<sup>1</sup>, Lauge Farnaes<sup>2</sup>, John Bradley<sup>2</sup>, Nicolas Tromas<sup>1</sup> & B. Jesse Shapiro<sup>1\*</sup>

5

6 1. Département de sciences biologiques, Université de Montréal, Canada

7 2. Rady Children's Hospital, University of California San Diego, USA

8

9 \* correspondence: [jesse.shapiro@umontreal.ca](mailto:jesse.shapiro@umontreal.ca)

10

11 **ABSTRACT**

12 *H. influenzae* causes common and sometimes severe pediatric disease including chronic  
13 obstructive respiratory disease, otitis media, and infections of the central nervous system.  
14 Serotype b strains, with a b-type capsule, have been the historical cause of invasive disease, and  
15 the introduction of a serotype b-specific vaccine has led to their decline. However,  
16 unencapsulated or non-b-type *H. influenzae* infections are not prevented by the vaccine and  
17 appear to be increasing in frequency. Here we report two pediatric cases of severe central nervous  
18 system *H. influenzae* infection presenting to the same hospital in San Diego, California during the  
19 same week in January 2016. Due to good vaccine coverage in this part of the world, *H. influenzae*  
20 cases are normally rare and seeing two cases in the same week was unexpected. We thus  
21 suspected a recent transmission chain, and possible local outbreak. To test this hypothesis, we  
22 isolated and sequenced whole genomes from each patient and placed them in a phylogenetic tree  
23 spanning the known diversity of *H. influenzae*. Surprisingly, we found that the two isolates (H1  
24 and H2) belonged to distantly related lineages, suggesting two independent transmission events  
25 and ruling out a local outbreak. Despite being distantly related, H1 and H2 belong to two  
26 different lineages that appear to engage in frequent horizontal gene transfer (HGT), suggesting  
27 overlapping ecological niches. Together, our comparative genomic analysis supports a scenario in  
28 which an f-type ancestor of H2 arrived in North America around 2011 and acquired an a-type  
29 capsule by recombination (HGT) with a recent ancestor of H1. Therefore, as in other bacterial  
30 pathogens, capsule switching by HGT may be an important evolutionary mechanism of vaccine  
31 evasion in *H. influenzae*.

32 **OUTCOME**

33 Two cases of severe central nervous system *H. influenzae* infection occurred during the same  
34 week in the same hospital in San Diego, California – a region where such infections are usually  
35 very rare due to vaccine coverage. We thus suspected a local outbreak of an *H. influenzae* clone  
36 not covered by the vaccine. Using whole genome sequencing and phylogenetic analysis of two  
37 isolates (H1 and H2, one from each patient), we found that they were distantly related, rapidly  
38 ruling out a local outbreak and suggesting independent transmission events. This result highlights  
39 the potential for rapid global spread of non-vaccine *H. influenzae* strains. In this case, both H1  
40 and H2 both encoded a-type capsules, whereas the vaccine targets b-type capsules. We also  
41 present comparative genomic evidence that a recent f-type ancestor of H2 acquired an a-type  
42 capsule locus from a recent ancestor of H1, and that this horizontal gene transfer (HGT) event  
43 likely happened in the past decade in North America, but probably not in the San Diego hospital.  
44 These results highlight the potential importance in HGT of the capsule locus in allowing *H.*  
45 *influenzae* to escape vaccine coverage.

46

47 **DATA SUMMARY**

48 *H. influenzae* H1 and H2 genome sequences have been deposited in NCBI under BioProject  
49 PRJNA534512.

## 50 INTRODUCTION

51  
52 *Haemophilus influenzae* is traditionally classified into encapsulated or unencapsulated  
53 strains, with encapsulated strains being subdivided into serotypes (or types) a-f, each with a  
54 distinct type of polysaccharide capsule. Type-b has long been associated with invasive disease  
55 (Pittman, 1931) and has thus been a major vaccine target. Since the introduction of vaccine  
56 against type-b *H. influenzae*, a dramatic decrease of severe cases has been observed (Peltola,  
57 2000). However, this drop in severe type-b infections was followed by an increase of acute  
58 infections caused by non-b-type (*i.e.* a, c, d, e, and f capsule types) and non-typeable  
59 (unencapsulated) strains (Ladhani et al., 2012; Headrick et al., 2018; Tsang et Ulanova, 2017;  
60 Giufrè et al 2017).

61  
62 As a common surface antigen and vaccine target, the capsule is a target of diversifying  
63 selection and the capsule locus is a hotspot of recombination in bacterial pathogens including  
64 *Klebsiella pneumoniae* (Wyres et al., 2015), *Streptococcus pneumoniae* (Mostowy et al., 2017),  
65 and *Neisseria meningitidis* (Bartley et al., 2017) – but has been less thoroughly studied in *H.*  
66 *influenzae*. Many (but not all) natural *H. influenzae* isolates are competent for DNA uptake  
67 (Maughan et Redfield, 2009), and *H. influenzae* housekeeping and lipopolysaccharide genes are  
68 inferred to undergo relatively frequent recombination (Vos et Didelot, 2009). Capsule types tend  
69 to be associated with particular phylogenetic lineages of *H. influenzae*, leading to the assertion  
70 that capsule genes evolve clonally, with limited recombination (De Chiara et al., 2014). On the  
71 other hand, the capsule locus can be deleted naturally by recombination (Kroll et al., 1988, and  
72 the capsule locus is occasionally recombined among phylogenetically distant lineages (Musser et  
73 al., 1988). Thus, capsular recombination in *H. influenzae* appears to be relatively rare, but its  
74 impact on the evolution and epidemiology of *H. influenzae* infections could be substantial. For  
75 example, capsular switching could allow successful pathogenic lineages to evade vaccines and  
76 persist. Alternatively, if capsular recombination is limited, we would expect vaccine lineages to  
77 be replaced with other lineages, encoding different capsules.

78  
79 Here we describe two *H. influenzae* genomes, each isolated from a meningitis patient at  
80 Rady Children’s Hospital (California, USA) within one week of each other in January of 2016.

81 As such severe central nervous system infections are extremely rare in Western countries since  
82 the introduction of *H. influenzae* vaccines in the 1990s, the appearance of two cases in a such  
83 narrow geographic and time window lead us to address the following questions using a  
84 comparative genomic approach:

- 85 1) Are the two strains closely related, suggesting an outbreak of a particular *H. influenzae*  
86 clone – possibly a vaccine-escape mutant? By placing the two strains on a phylogeny  
87 of other sequenced *H. influenzae* genomes, we found that the two strains were  
88 unrelated. This surprising result led us to ask a second question:  
89 2) Do these two unrelated strains share particular genes that might have allowed them  
90 both to emerge at the same place and time?

91

## 92 **METHODS**

### 93 **Strain collection and patient characteristics**

94 *H. influenzae* strains were isolated from blood culture of two unrelated individuals (Table 1).  
95 Patient #1 was an 11-month old female while Patient #2 was a 4-year-old male. They presented to  
96 Rady Children’s Hospital within one week of each other in January 2016. They were both treated  
97 with antibiotics and were eventually cured with no apparent complications. Blood culture was *H.*  
98 *influenzae* positive for both patients and showed that these strains were non-type b, but with an  
99 encapsulated appearance. Both strains were sent to the United States Centers for Disease Control  
100 and Prevention (CDC) for serotyping, which confirmed them both to be type a. Further patient  
101 characteristics are given in Table 1. Strains isolated from patients 1 and 2 were respectively  
102 named H1 and H2 in this study.

103

104 **Table 1.** Patient characteristics.

|                               | Patient #1                                     | Patient #2                                  |
|-------------------------------|------------------------------------------------|---------------------------------------------|
| Age                           | 11 months                                      | 4 years                                     |
| Positive culture              | Blood culture                                  | Blood and Cerebrospinal fluid (CSF) culture |
| CSF cell profile on first tap | Protein 267<br>Glucose 47<br>Erythrocytes 112, | Protein 68<br>Glucose 49<br>Erythrocytes 28 |

|                          | Nucleated cells 619                     | Nucleated cells 707     |
|--------------------------|-----------------------------------------|-------------------------|
| CNS complications        | Subdural empyema                        | Seizure                 |
| Antibiotic Treatment     | Vancomycin and meropenem<br>for 18 days | Ceftriaxone for 10 days |
| Time to fever resolution | 14 days                                 | 1 day                   |

105

## 106 **DNA extraction & sequencing**

107 *Haemophilus influenzae* strains were cultured overnight on chocolate agar plates (Thermo Fischer  
108 Scientific) and DNA was extracted using the Bactozol DNA extraction kit (MRC inc.). Extracted  
109 DNA was further purified using the PowerClean® Pro DNA Clean-Up Kit (MOBIO Laboratories  
110 Inc.). Libraries were prepared using the Nextera XT kit (Illumina Inc.) following the standard  
111 Illumina protocol and library size was confirmed at approximately 1000 bp with a Qiaxcel  
112 Advanced System (QIAGEN). We performed paired end sequencing (2 x 300 bp) using the  
113 MiSeq reagent Kit V3 (Illumina Inc.) on the MiSeq system (Illumina Inc.) yielding a total of  
114 1,128,523 paired-end reads for H1 and 1,708, 296 paired-end reads for H2.

115

## 116 **Genome assembly, annotation, and phylogenetics**

117 Sequencing reads were trimmed with Trimmomatic (Bolger et al., 2014) with default parameters.  
118 Trimmed reads were assembled into contigs using IDBA (Peng et al., 2012). We then compared  
119 the H1 and H2 genomes with a dataset of 80 non-typable, six b-capsule and one f-capsule  
120 genomes (previously described by De Chiara et al. 2014) using gene-by-gene alignments,  
121 described below. Consistent with the previous analysis of De Chiara et al., we identified six well-  
122 supported clades (named I-VI, following their nomenclature). To ensure that we did not miss  
123 close relatives of H1 or H2 not present in the De Chiara dataset, we searched NCBI for closely  
124 related genomes using a set of universal single copy genes extracted from H1 and H2 (Creevey et  
125 al., 2011). Using this approach, we identified two additional recently sequenced closely related  
126 encapsulated genomes: one f-capsule type isolated in Sweden in 2011 (Resman et al., 2011 ; Su et  
127 al., 2013) and one a-capsule type isolated in Canada in 2011 (NCBI accession number:  
128 CP017811.1). Ten sequences of *Haemophilus haemolyticus* were used as an outgroup for  
129 phylogenetic analyses. Contigs were annotated using the RAST server (Aziz et al., 2008).  
130 Translated gene predictions were assigned to orthologous groups using Orthofinder (Emms and

131 Kelly, 2015). 941 genes assigned to the core genome (present in single copy in each genome)  
132 were aligned using MUSCLE (Edgar, 2004). Concatenation of these aligned genes was to infer a  
133 core genome phylogeny using FastTreeMP (Price et al., 2009). We also used FastTreeMP to  
134 reconstruct each individual gene tree (or gene fragment for genes in the capsule operon).  
135 Phylogenies were displayed in FigTree (<http://tree.bio.ed.ac.uk/software/figtree/>). Gene  
136 presence/absence heatmaps were displayed in R with the heatmap.2 function of the ggplots  
137 package (<http://www.R-project.org/>). The same exact protocols of alignment and phylogenetic  
138 inference was applied on the smaller regions of the capsule genes.

139

#### 140 **Horizontal gene transfer detection**

141 To infer putative recent recombination due to horizontal gene transfer (HGT) between two  
142 strains, we used an explicit phylogenetic method where individual gene trees (including both core  
143 and flexible genes) were screened for phylogenetic incongruence with the reference tree,  
144 containing six major lineages, based on 941 core genes. A phylogenetic incongruence was  
145 considered as an HGT if a gene sequence from a lineage [i] was grouped in a well-supported  
146 clade (bootstrap value of 100) with a gene from a different lineage [j]. We also required the gene  
147 sequences from lineages [i] and [j] to share >97% nucleotide identity. As some flexible genes are  
148 shared uniquely between two isolates from different clades, we also considered these as putative  
149 HGTs if they shared >97% nucleotide identity.

150

## 151 **RESULTS**

152

### 153 **H1 and H2 genomes are distantly related**

154 The core genome phylogeny based on 941 aligned genes shows that H1 and H2 belong to two  
155 distinct lineages: H1 in clade VI and H2 in clade I (**Figure 1**). These two clades are distantly  
156 related, clade I being the first *H. influenzae* branch after its divergence from the *H. haemolyticus*  
157 outgroup. Within clade VI, H1 is the only type-a isolate in a sub-clade carrying b-type capsule  
158 genes, with the exception of one genome, Hi1008, which likely lost most of its capsule genes  
159 (Meyler et al., 2019). We searched the NCBI genome database to identify close relatives of H1  
160 and H2 not present in our phylogeny. The closest sequenced relative of H1, NML\_Hia1, was  
161 isolated in Canada in 2011, and also carries an a-type capsule locus. The closest sequenced

162 relatives of H2 are two f-type genomes: Hi794 (Finland, date unknown) and KR494 (Sweden,  
163 2011). As H1 and H2 are distantly related in the tree, they are clearly not epidemiologically  
164 linked and likely represent independent infection events.

165

### 166 **H1 and H2 belong to clades engaging in pervasive HGT**

167 Despite being phylogenetically unrelated, H1 and H2 were both isolated during the same week  
168 from the same hospital. We thus hypothesized that they may have recently exchanged genes via  
169 HGT. Using phylogenetic criteria to detect HGT (Methods) we did not identify any recent gene  
170 transfers between H1 and H2 (**Figure 1**). Rather, H1 and H2 had flexible gene profiles similar to  
171 other genomes from their respective clades (**Figure S1**). Despite the lack of recent HGT between  
172 H1 and H2, we did observe that HGTs were unevenly distributed between clades (chi-square =  
173 163.46, df = 14,  $P < 2.2e-16$ ) and that the two distantly related clades containing H1 and H2  
174 (clades I and VI) engaged in particularly pervasive HGT (**Figure 1**). These HGTs encode a mix  
175 of virus- and plasmid-related functions, antibiotic resistance genes, and metabolic genes (**Table**  
176 **S1**). Clades I and VI have similar profiles of selected virulence factors (De Chiara et al. 2014),  
177 and members of both clades tend to encode *hap*, *hia*, and *hif* virulence genes (**Figure S2**). Neither  
178 clade has a strong preference for a particular geographic region (**Figure S3**), time period (**Figure**  
179 **S4**), or infection site (**Figure S5**). It is thus unclear why clades I and VI apparently engage in  
180 more frequent HGT than other clades.

181

### 182 **Detailed phylogeny and HGT of the capsule locus**

183 The presence of two a-type strains (H1 and H2) in two distantly-related clades lead us to  
184 investigate in greater details the evolution of capsule locus genes. By manually inspecting  
185 individual gene alignments at this locus, we found that H1 and H2 had identical or very similar  
186 sequences spanning a ~5kb region encompassing most of the serotype-specific genes (**Figure 2**).  
187 These genetic similarities between H1 and H2 were not detected in the gene-by-gene analysis  
188 (**Figure 1**) because of conflicting phylogenetic signals within genes (**Figure 2**). NML\_Hia1,  
189 another a-type genome isolated in Canada in 2011, also shared a similar or identical sequence in  
190 the serotype-specific region, suggesting that the putative recombination event in this region  
191 occurred in 2011 or earlier, and that the sequence has subsequently accumulated relatively few  
192 mutations. Upstream and downstream of the serotype-specific region, H2 was most similar to f-

193 type strains (**Figure 2**). This suggests that an f-type ancestor of H2 acquired ~5kb of serotype-  
194 specific DNA from an a-type donor strain, resulting in a serotype switch. Thus, recent ancestors  
195 of H1 and H2 engaged in HGT at the capsule locus. However, the H1 and H2 are non-identical,  
196 notably in the *acsC* gene (6 substitutions over 2 400 bp) (**Figure 2**), making it unlikely that the  
197 exchange occurred in Rady Children's Hospital.

198

## 199 **DISCUSSION**

200 The appearance of two *H. influenzae* infections in the same hospital in the same week was highly  
201 unexpected because such infections are exceedingly rare in areas of high vaccine coverage. This  
202 raised concerns that the two cases were part of a local outbreak, involving *H. influenzae*  
203 transmission in the San Diego area. By sequencing the two isolate genomes (H1 and H2) and  
204 placing them on a phylogenetic tree encompassing the known diversity of *H. influenzae*, we  
205 found that they belonged to distantly related clades, indicating that each infection was acquired  
206 independently and the two were not linked in a recent transmission chain. The entire analysis,  
207 from strain isolate to sequencing and phylogenetic analysis, could be performed in about a week,  
208 allowing us to rapidly rule out local transmission. Rather, the observation that H1 and H2 are  
209 distantly related highlights the potential for rapid, potentially global spread of different *H.*  
210 *influenzae* lineages.

211 To our knowledge H2 is the first North American clade I genome to be sequenced,  
212 suggesting a recent transmission from Europe or Asia (**Figure S3**). H1 is part of clade VI and  
213 shares recent ancestry with another type-a Canadian isolate from 2011, suggesting that this type-a  
214 lineage has been circulating in North America for several years. Despite being distantly related,  
215 H1 and H2 share a very similar capsule locus, particularly in the serotype-specific region.  
216 Flanking the serotype-specific region and elsewhere in the genome, H2 is more similar to f-type  
217 strains. Together, these observations point to a scenario in which an f-type ancestor of H2 arrived  
218 in North America around 2011 and acquired an a-type capsule by recombination with a recent  
219 ancestor of H1. We also note that H1 and H2 belong to two clades (VI and I, respectively) that  
220 appear to engage in preferential HGT, possibly to cryptic niche overlap. Future work will be  
221 needed to confirm and understand the reasons for this preferential genetic exchange.

222 That both H1 and H2 were isolated at the same place and time appears to be a  
223 coincidence, but does suggest that these a-type strains are filling a vacant niche left by b-type



224 strains targeted by current vaccines. Our results also indicate that vaccines need not select for  
225 lineage replacement, but could allow multiple different lineages to adapt via acquisition of new  
226 capsule loci by HGT. We show that such a scenario is plausible, but further analysis of larger  
227 population genomic samples will be needed to assess the relative importance of lineage  
228 replacement vs. capsule HGT in the evolutionary response of *H. influenzae* to vaccine pressure.  
229

230 **Figures and legends**

231

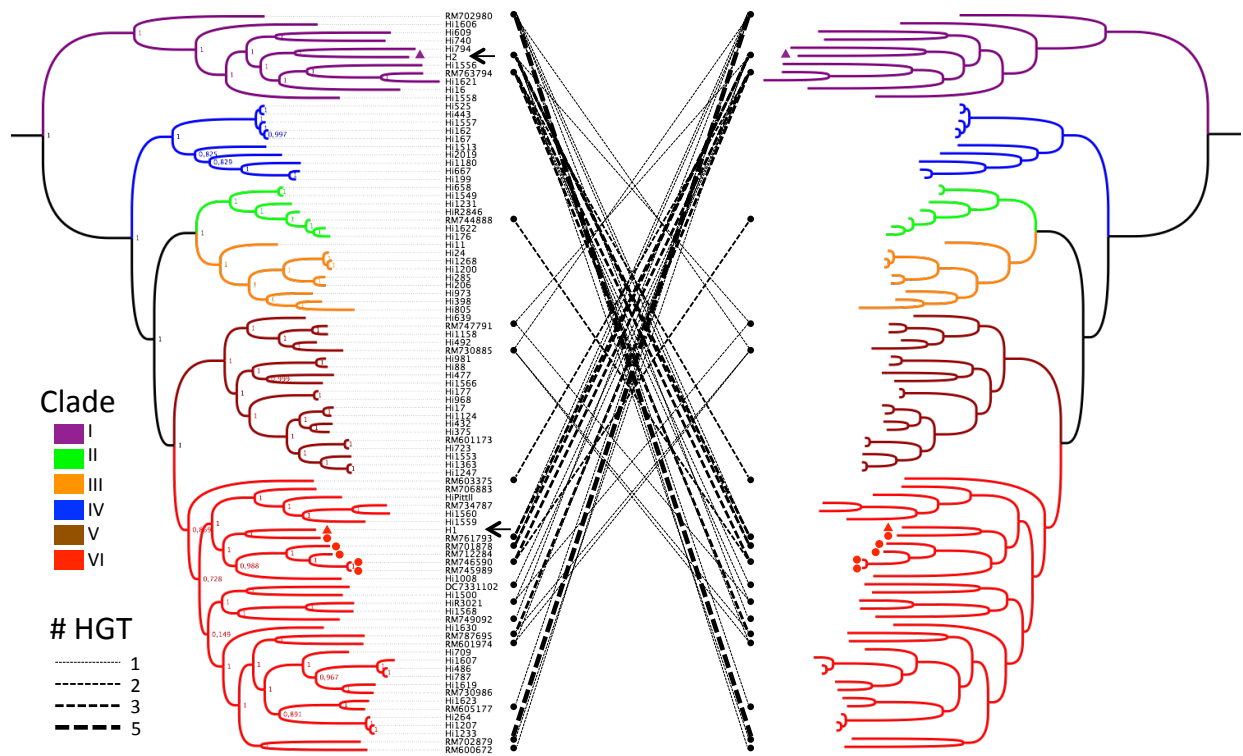

232

233

234 **Figure 1. Core genome phylogeny of *H. influenzae* and putative HGT events between clades.**

235 *H. haemolitycus* was used as an outgroup to root the tree (not shown). Encapsulated strains are

236 indicated with a circle (b-type) or a triangle (a-type); the remaining strains are unencapsulated.

237 H1 and H2 are indicated with arrows. Clades I-VI (following the nomenclature of De Chiara et al.

238 2014) are indicated in different colours. Putative HGT events between clades are indicated with

239 dashed lines. Line thickness indicates the number of HGTs (ranging from 1 to 5 genes).

240

241

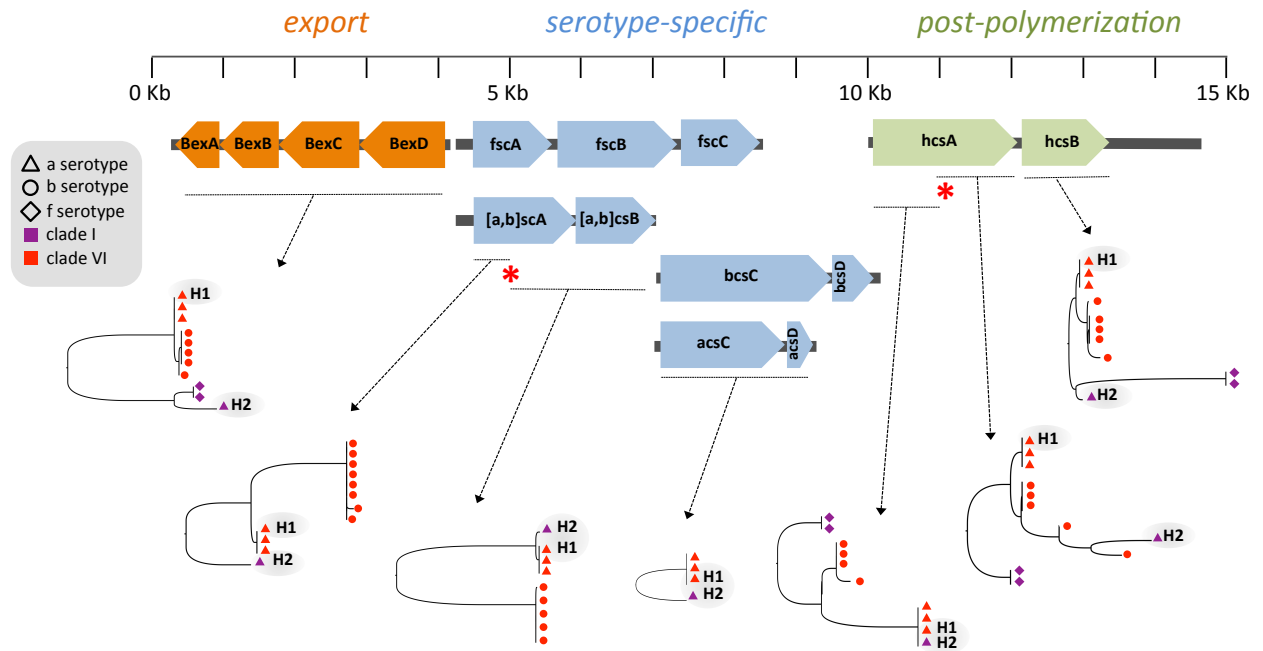

242

243

244 **Figure 2: Phylogenies of genes and regions within the capsule locus.** Dashed horizontal lines

245 indicate the region used for phylogenetic analysis. Red stars indicate putative recombination

246 breakpoints.

247

248

249 **Supplementary Table.**

250

251 **Table S1.** Annotated functions of putative HGTs between clades. Strain 1 and 2 indicated the two

252 strains involved in the putative HGT. Clades involved (I-VI) are shown in the far left column.

|           | Strain 1  | Strain 2             | Annotation                                                                              |
|-----------|-----------|----------------------|-----------------------------------------------------------------------------------------|
| I vs VI   | DC7331102 | RM763794             | D-hexose-6-phosphate mutarotase                                                         |
|           | H2        | RM601974             | peptidase M16                                                                           |
|           | H2        | RM701878             | Bicyclomycin resistance protein                                                         |
|           | H2        | RM701878             | EamA/RhaT family transporter                                                            |
|           | H2        | RM702879             | Gamma-glutamylputrescine oxidoreductase                                                 |
|           | H2        | RM747791             | 6,7-dimethyl-8-ribityllumazine synthase                                                 |
|           | NML_Hia1  | H2                   | mannonate dehydratase                                                                   |
|           | RM600672  | RM702980             | iron-sulfur cluster insertion protein ErpA                                              |
|           | RM603375  | RM702980             | anticodon nuclease / ATPase AAA                                                         |
|           | RM603375  | RM702980             | restriction endonuclease subunit S                                                      |
|           | RM603375  | RM702980             | HD domain-containing protein - guanosine-3',5'-bis(diphosphate) 3'-pyrophosphohydrolase |
|           | RM603375  | RM702980             | NADH oxidase                                                                            |
|           | RM603375  | RM702980             | toxin Fic family protein                                                                |
|           | RM603375  | RM763794             | electron transport complex subunit RsxE                                                 |
|           | RM603375  | RM763794             | phage tail protein                                                                      |
|           | RM605177  | RM702980             | osmotically-inducible protein OsmY                                                      |
|           | RM701878  | RM702980             | YfcC family protein                                                                     |
|           | RM702980  | RM730885             | nitrate/nitrite two-component system sensor histidine kinase NarQ                       |
|           | RM702980  | RM749092             | TonB-dependent siderophore receptor                                                     |
|           | RM702980  | RM749092             | phage baseplate protein                                                                 |
|           | RM702980  | RM749092             | phage tail protein                                                                      |
|           | RM702980  | RM761793             | long-chain-fatty-acid--CoA ligase FadD                                                  |
|           | RM749092  | RM763794             | hypothetical protein                                                                    |
|           | RM761793  | RM763794             | Transcription termination/antitermination protein NusG                                  |
|           | RM763794  | RM787695             | plasmid RP4 TraN-related protein                                                        |
|           | RM763794  | RM787695             | HD domain-containing protein / guanosine-3',5'-bis(diphosphate) 3'-pyrophosphohydrolase |
| RM763794  | RM787695  | hypothetical protein |                                                                                         |
| III vs VI | RM744888  | RM746590             | hypothetical protein                                                                    |
|           | RM744888  | RM746590             | conjugative coupling factor TraD                                                        |
| V vs VI   | HiR3021   | RM747791             | conjugal transfer protein TraG                                                          |
|           | RM601974  | RM730885             | 5'-methylthioadenosine/adenosylhomocysteine nucleosidase                                |
|           | RM730885  | RM787695             | long-chain fatty acid--CoA ligase                                                       |

253

254 **References :**

255

256 Aziz, R.K. *et al.* The RAST Server: rapid annotations using subsystems technology. *BMC*  
257 *Genomics* **9**, 75 (2008).

258 Bartley, S.N. *et al.* Acquisition of the capsule locus by horizontal gene transfer  
259 in *Neisseria meningitidis* is often accompanied by the loss of UDP-GalNAc synthesis. *Sci Rep* **7**,  
260 44442 (2017).

261 Bolger, A.M., Lohse, M. & Usadel, B. Trimmomatic: a flexible trimmer for Illumina  
262 sequence data. *Bioinformatics* **30**, 2114-20 (2014).

263 Creevey, C.J., Doerks, T., Fitzpatrick, D.A., Raes, J. & Bork P. Universally  
264 distributed single-copy genes indicate a constant rate of horizontal transfer. *PLOS ONE* **6**, e22099  
265 (2011).

266 De Chiara, M. *et al.* Genome sequencing of disease and carriage isolates of nontypeable  
267 *Haemophilus influenzae* identifies discrete population structure. *Proc. Natl. Acad. Sci. U.S.A.*  
268 **111**, 5439–5444 (2014).

269 Edgar, R. MUSCLE: multiple sequence alignment with high accuracy and high  
270 throughput. *Nucleic Acids Res* **32**, 1792-1797 (2004).

271 Emms D.M & Kelly, S. OrthoFinder: solving fundamental biases in whole genome  
272 comparisons dramatically improves orthogroup inference accuracy. *Genome Biol* **16**, 157 (2015).

273 Giufrè, M., Cardines, R., Brigante, G., Orecchioni, F. & Cerquetti, M. Emergence of  
274 Invasive *Haemophilus influenzae* Type A Disease in Italy. *Clin. Infect. Dis.* **64**, 1626–1628  
275 (2017).

276 Headrick, A., Schmit, E. O. & Kimberlin, D. W. Fulminant Haemophilus Influenzae Type  
277 a Infection in a 4-year-old with Previously Undiagnosed Asplenic Heterotaxy. *Pediatr. Infect.*  
278 *Dis. J.* **37**, e108–e110 (2018).

279 Heikkinen, T. *et al.* Incidence of influenza in Finnish children. *Pediatr. Infect. Dis. J.* **22**,  
280 S204-206 (2003).

281 Kroll, J. S., Hopkins, I. & Moxon, E. R. Capsule loss in H. influenzae type b occurs by  
282 recombination-mediated disruption of a gene essential for polysaccharide export. *Cell* **53**, 347–  
283 356 (1988).

284 Ladhani, S. N. *et al.* Invasive Haemophilus influenzae serotype e and f disease, England  
285 and Wales. *Emerging Infect. Dis.* **18**, 725–732 (2012).

286 Maughan, H. & Redfield, R. J. Extensive Variation in Natural Competence in  
287 Haemophilus Influenzae. *Evolution* **63**, 1852–1866 (2009).

288 Meyler, K. *et al.* Spontaneous capsule loss in Haemophilus influenzae serotype b  
289 associated with Hib conjugate vaccine failure and invasive disease. *Clin Microbiol Infect* **25**, 390-  
290 391 (2019).

291 Mostowy, R.J. *et al.* Pneumococcal capsule synthesis locus cps as evolutionary hotspot  
292 with potential to generate novel serotypes by recombination. *Mol Biol Evol* **34**, 2537-2554  
293 (2017).

294 Musser, J. M., Kroll, J. S., Moxon, E. R. & Selander, R. K. Evolutionary genetics of the  
295 encapsulated strains of Haemophilus influenzae. *Proc Natl Acad Sci U S A* **85**, 7758–7762  
296 (1988).

297 Peng, Y., Leung, H.C., Yiu, S.M. & Chin F.Y. IDBA-UD: a de novo assembler for single-  
298 cell and metagenomic sequencing data with highly uneven depth. *Bioinformatics* **28**, 1420-8  
299 (2012).

300  
301 Pittman, M. Variation and type specificity in the bacterial species *Haemophilus influenzae*.  
302 *J. Exp. Med.* **53**, 471–492 (1931).  
303 Price, M.N., Dehal, P.S. & Arkin, A.P. FastTree: computing large minimum evolution  
304 trees with profiles instead of a distance matrix. *Mol Biol Evol* **26**, 1641-50 (2009).  
305 Resman, F. *et al.* Necrotizing myositis and septic shock caused by *Haemophilus*  
306 *influenzae* type f in a previously healthy man diagnosed with an IgG3 and a mannose-binding  
307 lectin deficiency. *Scand J Infect Dis* **43**, 972-6 (2011).  
308 Su, Y.C., Hörhold, F., Singh, B. & Riesbeck, K. Complete Genome Sequence of  
309 Encapsulated *Haemophilus influenzae* Type f KR494, an Invasive Isolate That Caused  
310 Necrotizing Myositis. *Genome Announc* **1**, e00470-13 (2013).  
311 Tsang, R. S. W. & Ulanova, M. The changing epidemiology of invasive *Haemophilus*  
312 *influenzae* disease: Emergence and global presence of serotype a strains that may require a new  
313 vaccine for control. *Vaccine* **35**, 4270–4275 (2017).  
314 Vos, M. & Didelot, X. A comparison of homologous recombination rates in bacteria and  
315 archaea. *ISME J* **3**, 199–208 (2009).  
316 Wyres, K.L. *et al.* Extensive Capsule Locus Variation and Large-Scale Genomic  
317 Recombination within the *Klebsiella pneumoniae* Clonal Group 258. *Genome Biol Evol* **7**, 1267-  
318 79 (2015).
